# Supplementary material for: Predictors of Nursing Facility Entry by Medicaid-Only Older Adults and Persons With Disabilities in California
Source: PubMed Central journal article supplement — Inquiry. 2018 Apr 10;55:0046958018768316. doi: 10.1177/0046958018768316 (PMC5896851; doi:10.1177/0046958018768316), 2018-04-10
Supplement: Supplement.010418.pdf [file Supplement.010418.pdf]

**Supplementary Material****Table A1.** Additional characteristics of Adult Medicaid-only Beneficiaries Who Initiated Long-term Services and Supports: California, 2006-2007

| Variables                               | HCBS <sup>a</sup><br>n=26,031 (81.7) | Nursing Facility <sup>b</sup><br>n=5,818 (19.3) | Total<br>n=31,849 |
|-----------------------------------------|--------------------------------------|-------------------------------------------------|-------------------|
| Central nervous system conditions,n (%) |                                      |                                                 |                   |
| Dementia                                | 83 (0.3)                             | 99 (1.7)                                        | 182 (0.6)         |
| Movement Disorder                       | 570 (2.2)                            | 296 (5.1)                                       | 855 (2.7)         |
| Other CNS                               | 1,947 (7.5)                          | 841 (14.5)                                      | 2788 (8.8)        |
| Psychological conditions,n(%)           |                                      |                                                 |                   |
| Mood disorder                           | 1,915 (7.4)                          | 669 (11.5)                                      | 2,584 (8.1)       |
| Schizophrenia/Psychosis                 | 656 (2.5)                            | 428 (7.4)                                       | 1,084 (3.4)       |
| Personality disorder                    | 202 (0.8)                            | 126 (2.2)                                       | 328 (1.0)         |
| Other psychological disorder            | 278 (1.1)                            | 109 (1.9)                                       | 387 (1.2)         |
| Substance use disorders,n(%)            |                                      |                                                 |                   |
| Alcohol                                 | 1,580 (6.1)                          | 801 (13.8)                                      | 2,381 (7.5)       |
| Other drug                              | 1,552 (6.0)                          | 572 (9.8)                                       | 2,124 (6.7)       |

<sup>a</sup>HCBS: Home and Community-Based Services.

<sup>b</sup>p-values <.0001 for all HCBS versus Nursing Facility recipient comparisons.

**Table A2.** Additional Chronic Condition Factors Associated with Extended Nursing Facility Entry Versus Home- and Community-Based Services Among Medicaid-Only Adult Beneficiaries: California, 2006-2007

| Independent Variables                  | Total Entrants |             |
|----------------------------------------|----------------|-------------|
|                                        | Odds Ratio     | 95% CI      |
| Age (age <45 reference)                |                |             |
| 45-54                                  | 1.30***        | (1.18-1.43) |
| 55-64                                  | 1.65***        | (1.50-1.81) |
| 65 or more                             | 0.72***        | (0.63-0.82) |
| Female (y/n)                           | 0.62***        | (0.58-0.66) |
| Race/Ethnicity                         |                |             |
| Hispanic                               | 0.77***        | (0.71-0.85) |
| Black                                  | 0.81***        | (0.75-0.88) |
| Asian                                  | 0.60***        | (0.54-0.68) |
| Other                                  | 1.34***        | (1.19-1.51) |
| 3 or more ADL limitations <sup>a</sup> | 3.87***        | (3.63-4.14) |
| Cognitive limitations <sup>b</sup>     | 1.56***        | (1.46-1.66) |
| CDPS <sup>c</sup>                      | 1.00           | (0.98-1.03) |
| Central nervous system conditions      |                |             |
| Dementia                               | 2.47***        | (1.79-3.41) |
| Movement disorder                      | 1.39***        | (1.17-1.64) |
| Other CNS disorder                     | 1.31***        | (1.18-1.46) |
| Psychological condition                |                |             |
| Mood disorder                          | 1.12           | (1.00-1.26) |
| Schizophrenia/Psychosis                | 2.53***        | (2.18-2.94) |
| Personality disorder                   | 1.63***        | (1.24-2.13) |
| Other psychological disorder           | 1.09           | (0.84-1.41) |
| Substance abuse disorders              |                |             |
| Alcohol use disorder                   | 1.49***        | (1.33-1.66) |
| Other drug use disorder                | 1.08           | (0.95-1.23) |
| Living alone                           | 1.40***        | (1.30-1.51) |
| Homeless                               | 4.16***        | (3.54-4.88) |
| Medically Needy                        | 2.60***        | (2.41-2.81) |

*p* \*\*\* <.001 \*\* <.01

<sup>a</sup>Limitations in activities of daily living (bathing, dressing, toileting, transferring, eating

<sup>b</sup>Limitation in Memory, Orientation, or Judgment requiring assistance, supervision or cueing.

<sup>c</sup>Chronic Illness and Disability Payment System tool consolidates diagnostic codes into 58 categories and assigns each a score that represents the incremental, prospective expenditure risk associated with that category. Higher scores reflect greater morbidity.

**Tables A3-A5.** Chronic Illness and Disability Payment System diagnoses used to identify central nervous system, psychological, and substance abuse disorders among Medicaid-only beneficiaries receiving long-term services and supports.

### **A3. Central Nervous System Disorders**

| <b>Major Category</b>                   | <b>Conditions</b>                                                 |
|-----------------------------------------|-------------------------------------------------------------------|
| <b>Movement and paralytic disorders</b> | Leukodystrophy                                                    |
|                                         | Cerebral lipidoses                                                |
|                                         | Cerebral degeneration in lipidosis                                |
|                                         | Primary lateral sclerosis                                         |
|                                         | Motor neuron disease                                              |
|                                         | Corticobasal degeneration                                         |
|                                         | Cerebral degeneration NEC                                         |
|                                         | Spinal muscular atrophy                                           |
|                                         | Combined degenerative cord in other disease                       |
|                                         | Cerebellar ataxia                                                 |
|                                         | Friedreich's ataxia                                               |
|                                         | Primary cerebellar degenerans                                     |
|                                         | Amyotrophic lateral sclerosis                                     |
|                                         | Progressive bulbar palsy                                          |
|                                         | Pseudobulbar palsy                                                |
|                                         | Progressive muscular atrophy                                      |
|                                         | Anterior horn cell disease                                        |
|                                         | Kugelberg-Welander disease                                        |
|                                         | Werdnig-Hoffmann disease                                          |
|                                         | Spinal cord disease NOS                                           |
|                                         | Spinocerebellar disease NEC/NOS                                   |
|                                         | Parkinson's disease                                               |
|                                         | Secondary parkinsonism                                            |
|                                         | Neuroleptic malignant syndrome                                    |
|                                         | Paralysis agitans                                                 |
|                                         | Other degenerative diseases of the basal ganglia                  |
|                                         | Extrapyramidal disorders                                          |
|                                         | Unspecified extrapyramidal disease and abnormal movement disorder |
|                                         | Acquired torsion dystonia NEC                                     |
|                                         | Blepharospasm                                                     |
|                                         | Spasmodic torticollis                                             |
|                                         | Fragmented torsion dystonia NEC                                   |
|                                         | Orofacial dyskinesia                                              |
|                                         | Acute dystonia due to drugs                                       |
|                                         | Subacute dyskinesia due to drug                                   |
|                                         | Stiff-man syndrome                                                |
|                                         | Benign shuddering attacks                                         |
|                                         | Restless legs syndrome                                            |
|                                         | Organic writers' cramp                                            |
|                                         | Multiple sclerosis                                                |
|                                         | CNS demyelination                                                 |
|                                         | Neuromyelitis optica                                              |
|                                         | Myelopathy NEC                                                    |
|                                         | Schilder's disease                                                |
|                                         | Athetoid cerebral palsy                                           |
|                                         | Hereditary spastic paraplegia                                     |
|                                         | <b>Dementia</b>                                                   |

|                              |                                                    |
|------------------------------|----------------------------------------------------|
|                              | Alzheimer's disease                                |
|                              | Frontotemporal dementia NEC                        |
|                              | Dementia w Lewy bodies                             |
|                              | Mild cognitive impairment                          |
|                              | Cerebral degeneration NOS                          |
|                              | Pick's disease                                     |
|                              | Senile dementia                                    |
|                              | Presenile dementia                                 |
| <b>Other CNS</b>             |                                                    |
| <i>Inflammatory Diseases</i> | Meningitis                                         |
|                              | Hemophilus meningitis                              |
|                              | Pneumococcal meningitis                            |
|                              | Streptococcal meningitis                           |
|                              | Staphylococcal meningitis                          |
|                              | Meningitis in other bacterial disease              |
|                              | Bacterial meningitis NOS                           |
|                              | Encephalitis                                       |
|                              | Rickettsial encephalitis                           |
|                              | Protozoal encephalitis                             |
|                              | Myelitis                                           |
|                              | Acute myelitis                                     |
|                              | Idiopathic transverse myelitis                     |
|                              | Encephalitis and Myelitis                          |
|                              | Encephalomyelitis                                  |
|                              | Postinfectious encephalitis                        |
|                              | Postinfectious myelitis                            |
|                              | Other causes of encephalitis and encephalomyelitis |
| <i>Autonomic disorders</i>   | Idiopathic peripheral autonomic neuropathy         |
|                              | Autonomic neuropathy in other disease              |
|                              | Autonomic dysreflexia                              |
|                              | Autonomic nerve disorder NEC                       |
|                              | Carotid sinus syndrome                             |
|                              | Reflex sympathetic dystrophy                       |
| <i>Other</i>                 | Communicating hydrocephalus                        |
|                              | Obstructive hydrocephalus                          |
|                              | Normal pressure hydrocephalus                      |
|                              | Syringomyelia and syringobulbia                    |
|                              | Reye's syndrome                                    |

#### **A4. Psychological Disorders**

| <b>Category</b>                    | <b>Conditions</b>                      |
|------------------------------------|----------------------------------------|
| <b>Schizophrenia and psychoses</b> | Simple type schizophrenia              |
|                                    | Disorganized type schizophrenia        |
|                                    | Catatonic type schizophrenia           |
|                                    | Paranoid type schizophrenia            |
|                                    | Latent schizophrenia                   |
|                                    | Paranoid schizophrenia                 |
|                                    | Other specified types of schizophrenia |
|                                    | Unspecified schizophrenia              |
|                                    | Hebephrenia                            |
|                                    | Psychotic disorder                     |
|                                    | Schizophreniform disorder              |

|                                           |                                                                                          |
|-------------------------------------------|------------------------------------------------------------------------------------------|
|                                           | Excitative type psychosis                                                                |
|                                           | Catatonia                                                                                |
|                                           | Psychosis NOS                                                                            |
|                                           | Senile psychosis                                                                         |
|                                           | Senile delusion                                                                          |
|                                           | Presenile delusion                                                                       |
| <b>Mood[affective] disorders</b>          | Chronic hypomanic personality                                                            |
|                                           | Chronic depressive personality                                                           |
|                                           | Bipolar I disorders: current mania, current depression,<br>with/without psychosis, mixed |
|                                           | Cyclothymic disorder                                                                     |
|                                           | Major depressive affective disorder                                                      |
|                                           | Recurrent manic disorder                                                                 |
|                                           | Overanxious disorder                                                                     |
|                                           | Depressive psychosis                                                                     |
|                                           | Recurrent depressive psychosis                                                           |
|                                           | Reactive depressive psychosis                                                            |
|                                           | Presenile depression                                                                     |
|                                           | Senile depressive                                                                        |
| <b>Personality disorders</b>              | Paranoid personality disorder                                                            |
|                                           | Schizoaffective disorders                                                                |
|                                           | Schizophreniform disorders                                                               |
|                                           | Obsessive-compulsive disorder                                                            |
|                                           | Histrionic personality disorder                                                          |
|                                           | Dependent personality                                                                    |
|                                           | Antisocial personality                                                                   |
|                                           | Personality Disorder NOS                                                                 |
|                                           | Narcissistic personality                                                                 |
|                                           | Borderline personality                                                                   |
|                                           | Avoidant personality                                                                     |
|                                           | Passive-aggressive personality                                                           |
|                                           | Affective personality disorder                                                           |
|                                           | Schizoid personality disorder                                                            |
|                                           | Explosive personality                                                                    |
| <b>Other Psychological Disorders</b>      |                                                                                          |
| <i>Development and childhood disorder</i> | Childhood disintegrative disorder                                                        |
|                                           | Other pervasive developmental disorder                                                   |
|                                           | Attention deficit disorder                                                               |
|                                           | Academic underachievement                                                                |
|                                           | Conduct disorder                                                                         |
|                                           | Hyperkinetic disorder                                                                    |
|                                           | Oppositional defiant disorder                                                            |
|                                           | Autistic disorder                                                                        |
|                                           | Selective mutism                                                                         |
|                                           | Social conduct disorder                                                                  |
|                                           | Misery & unhappiness disorder                                                            |
|                                           | Identity disorder                                                                        |

|                                             |                                                                                                                                                                                                                                                                                                                                                                                                                                  |
|---------------------------------------------|----------------------------------------------------------------------------------------------------------------------------------------------------------------------------------------------------------------------------------------------------------------------------------------------------------------------------------------------------------------------------------------------------------------------------------|
| <i>Eating and impulse control disorders</i> | Introverted disorder<br>Shyness disorder<br>Bulimia nervosa                                                                                                                                                                                                                                                                                                                                                                      |
|                                             | Pica<br>Eating disorder NOS<br>Anorexia nervosa<br>Impulse control disorder<br>Pathological gambling<br>Intermittent explosive disorder<br>Isolated explosive disorder<br>Kleptomania<br>Pyromania<br>Unsocial aggression<br>Unsocial unaggression                                                                                                                                                                               |
| <i>Other</i>                                | Relationship problems<br>Pseudobulbar affect<br>Musculoskeletal malfunction arising from mental factors<br>Psychogenic disorders: musculoskeletal, cardiovascular, skin, respiratory, gastrointestinal, genitourinary, endocrine, sensory<br>Psychogenic vomiting<br>Adjustment disorder<br>Adjustment reaction<br>Reactive confusion<br>Acute paranoid reaction<br>Rumination disorder<br>Presenile delirium<br>Senile delirium |

**A5. Substance Use Disorders**

| <b>Category</b>                                      | <b>Conditions</b>                                                                                                                                                                                                       |
|------------------------------------------------------|-------------------------------------------------------------------------------------------------------------------------------------------------------------------------------------------------------------------------|
| <b>Alcohol Use Disorder</b>                          | Alcohol abuse<br>Alcohol withdrawal<br>Alcohol mental disorder<br>Acute alcohol intoxication<br>Alcohol dependence<br>Delirium tremens<br>Alcohol amnestic disorder<br>Alcohol persistent dementia<br>Alcohol psychosis |
| <b>Other Drug Use Disorders</b>                      |                                                                                                                                                                                                                         |
| <i>Opioid Disorder</i>                               | Opioid abuse<br>Opioid type dependence<br>Combinations of opioid type drug with any other drug dependence                                                                                                               |
| <i>Prescription medication disorder (non-opioid)</i> | Sedative, hypnotic or anxiolytic abuse                                                                                                                                                                                  |
| <i>Other drug disorder</i>                           | Antidepressant abuse<br>Sedative, hypnotic or anxiolytic dependence<br>Amphetamine or related acting sympathomimetic abuse<br>Amphetamine and other psychostimulant dependence<br>Hallucinogen abuse                    |

Hallucinogen dependence  
Cocaine abuse  
Cocaine dependence  
Drug-induced psychotic disorder  
Pathologic drug intoxication  
Drug-induced delirium  
Drug mental disorder NOS  
Drug-induced psychiatric disorder w delusions  
Drug-induced psychiatric disorder w hallucinations  
Drug persisting dementia  
Drug persisting amnesic disorder  
Drug-induced mood disorder  
Drug induced sleep disorder  
Drug withdrawal  
Other specified drug dependence  
Combinations of drug dependence excluding opioid type drug  
Other combination drug dependence
